# Supplementary material for: Cyclohexylmethylammonium iodide-based bilateral interface engineering for efficient perovskite solar cells with improved stability and negligible hysteresis
Source: Royal Society of Chemistry journal article supplement (doi:10.1039/d5tc00964b), 2025-01-01
Supplement: d5tc00964b1.pdf [file d5tc00964b1.pdf]

# Cyclohexylmethyllummonium iodide-based bilateral interface engineering for efficient perovskite solar cells with improved stability and negligible hysteresis

*Litong Zhou<sup>‡</sup>, Yu Huo<sup>‡</sup>, Guangmei Zhai<sup>\*</sup>, Zhuoyu Zhao, Chunyan Yu<sup>\*</sup>, Wei Jia,  
Bingshe Xu*

Key Laboratory of Interface Science and Engineering in Advanced Materials of  
Ministry of Education, College of Materials Science and Engineering, Taiyuan  
University of Technology, Taiyuan, Shanxi 030024, China

<sup>‡</sup> These authors contribute equally to this work.

<sup>\*</sup>Corresponding Authors: E-mail: zhaiguangmei@tyut.edu.cn (G. Zhai);  
yuchunyan@tyut.edu.cn (C. Yu)

Table S1 Photovoltaic performance parameters of Control, B-1, S-3 and B-1+S-3

| Sample  | $V_{oc}$ [V] | $J_{sc}$ [mA·cm <sup>-2</sup> ] | FF [%]     | PCE [%]    |
|---------|--------------|---------------------------------|------------|------------|
| Control | 1.04±0.02    | 22.97±0.43                      | 68.36±2.37 | 16.36±0.71 |
| B-1     | 1.08±0.01    | 23.64±0.27                      | 72.02±1.33 | 18.42±0.30 |
| S-3     | 1.09±0.01    | 23.57±0.55                      | 73.39±2.89 | 18.90±0.56 |
| B-1+S-3 | 1.10±0.01    | 24.17±0.31                      | 75.70±2.31 | 20.01±0.42 |
